# Supplementary material for: No Evidence of Association between HIV-1 and Malaria in Populations with Low HIV-1 Prevalence
Source: PubMed Central journal article supplement (PMC3155564; doi:10.1371/journal.pone.0023458), 2011-08-12
Supplement: pone.0023458.s001.pdf [file pone.0023458.s001.pdf]

**Table S1.** HIV prevalence by socio-economic and biological characteristics in western sub-Saharan Africa and Cameroon.

| <b>Characteristics</b>    | <b>Western Africa</b> | <b>Cameroon</b>    |
|---------------------------|-----------------------|--------------------|
|                           | N (% HIV-positive)    | N (% HIV-positive) |
| <b>Malaria</b>            |                       |                    |
| <i>Pf</i> PR ≤ 0.46       | 10 207 (1.58)         | 4871 (4.1)         |
| <i>Pf</i> PR > 0.46       | 30 857 (1.48)         | 5217 (6.4)         |
| <b>Gender</b>             |                       |                    |
| Female                    | 22 768 (1.80)         | 5102 (6.7)         |
| Male                      | 18 296 (1.15)         | 4986 (4.0)         |
| <b>Age</b>                |                       |                    |
| 15-19                     | 8690 (0.52)           | 2443 (1.4)         |
| 20-24                     | 6844 (1.18)           | 1940 (5.0)         |
| 25-29                     | 6006 (2.00)           | 1582 (8.2)         |
| 30-34                     | 5247 (2.19)           | 1245 (8.5)         |
| 35-39                     | 5009 (2.15)           | 966 (8.3)          |
| 40-49                     | 7614 (1.60)           | 1476 (5.6)         |
| 50-59                     | 1654 (1.75)           | 436 (2.0)          |
| <b>Place of residence</b> |                       |                    |
| Urban                     | 13 589 (2.25)         | 4887 (6.6)         |
| Rural                     | 27 475 (1.16)         | 5201 (4.3)         |
| <b>Marital status</b>     |                       |                    |
| Never married             | 11 575 (0.83)         | 3160 (2.7)         |
| Currently married         | 27 349 (1.60)         | 6013 (5.8)         |
| Formerly married          | 2140 (4.06)           | 915 (12.0)         |
| <b>Religion</b>           |                       |                    |
| Muslim                    | 19 884 (1.31)         | 1628 (4.70)        |
| Christian                 | 12 755 (1.65)         | 4051 (5.60)        |
| Traditional religion      | 388 (0.25)            | 271 (1.85)         |
| Other                     | 8037 (1.87)           | 4138 (5.58)        |

**Wealth index**

|         |             |            |
|---------|-------------|------------|
| Poorest | 8469 (1.02) | 1569 (2.9) |
| Poorer  | 8235 (1.25) | 1819 (3.2) |
| Middle  | 8219 (1.27) | 2264 (6.0) |
| Richer  | 7937 (1.88) | 2189 (7.0) |
| Richest | 8204 (2.17) | 2247 (6.7) |

**Highest educational level**

|                |               |            |
|----------------|---------------|------------|
| None           | 21 502 (1.30) | 1504 (3.6) |
| Primary school | 8460 (1.45)   | 4007 (5.7) |
| Secondary      | 10 268 (1.94) | 4217 (5.9) |
| Higher         | 834 (1.99)    | 360 (4.4)  |

**Genital ulceration**

|                                      |               |            |
|--------------------------------------|---------------|------------|
| No genital ulceration last 12 months | 40 644 (1.42) | 9843 (5.5) |
| Genital ulceration last 12 months    | 420 (2.22)    | 245 (9.7)  |

**Male circumcision**

|                |               |             |
|----------------|---------------|-------------|
| No circumcised | 1018 (1.79)   | 253 (1.59)  |
| Circumcised    | 17 278 (1.31) | 4733 (4.18) |

---
