# Supplementary material for: No Evidence of Association between HIV-1 and Malaria in Populations with Low HIV-1 Prevalence
Source: PubMed Central journal article supplement (PMC3155564; doi:10.1371/journal.pone.0023458), 2011-08-12
Supplement: pone.0023458.s002.pdf [file pone.0023458.s002.pdf]

**Table S2.** Unadjusted and adjusted results from western sub-Saharan Africa: HIV serostatus according to selected socio-economic and biological characteristics.

| <b>Indicator</b>          | <b>OR (95% CI)</b> |                  |
|---------------------------|--------------------|------------------|
|                           | Unadjusted         | Adjusted         |
| <b>Malaria</b>            |                    |                  |
| <i>PfPR</i> ≤ 0.46        | 1.00               | 1.00             |
| <i>PfPR</i> > 0.46        | 0.95 (0.74-1.21)   | 1.14 (0.86-1.50) |
| <b>Gender</b>             |                    |                  |
| Female                    | 1.00               | 1.00             |
| Male                      | 0.64 (0.53-0.77)   | 0.63 (0.51-0.78) |
| <b>Age</b>                |                    |                  |
| 15-19                     | 1.00               | 1.00             |
| 20-24                     | 2.39 (1.58-3.62)   | 2.12 (1.38-3.25) |
| 25-29                     | 4.18 (2.82-6.17)   | 3.66 (2.35-5.68) |
| 30-34                     | 4.68 (3.16-6.94)   | 4.11 (2.60-6.51) |
| 35-39                     | 4.62 (3.10-6.87)   | 4.18 (2.62-6.67) |
| 40-49                     | 3.46 (2.34-5.12)   | 3.14 (1.97-4.99) |
| 50-59                     | 3.91 (2.28-6.72)   | 5.30 (2.84-9.88) |
| <b>Place of residence</b> |                    |                  |
| Urban                     | 1.00               | 1.00             |
| Rural                     | 0.48 (0.39-0.60)   | 0.58 (0.43-0.78) |
| <b>Marital status</b>     |                    |                  |
| Never married             | 1.00               | 1.00             |
| Currently married         | 2.19 (1.70-2.82)   | 1.17 (0.85-1.63) |
| Formerly married          | 5.45 (3.90-7.62)   | 2.55 (1.73-3.77) |
| <b>Religion</b>           |                    |                  |
| Muslim                    | 1.00               | 1.00             |
| Christian                 | 1.28 (1.01-1.62)   | 1.11 (0.86-1.46) |
| Traditional religion      | 0.24 (0.02-2.45)   | 0.28 (0.02-2.87) |
| Other                     | 1.39 (1.07-1.80)   | 1.24 (0.94-1.63) |

**Wealth index**

|         |                  |                  |
|---------|------------------|------------------|
| Poorest | 1.00             | 1.00             |
| Poorer  | 1.20 (0.85-1.69) | 1.15 (0.82-1.62) |
| Middle  | 1.21 (0.86-1.70) | 1.10 (0.78-1.56) |
| Richer  | 1.81 (1.31-2.51) | 1.40 (0.97-2.01) |
| Richest | 2.01 (1.45-2.77) | 1.38 (0.92-2.08) |

**Highest educational level**

|                |                  |                  |
|----------------|------------------|------------------|
| None           | 1.00             | 1.00             |
| Primary school | 1.03 (0.80-1.32) | 1.21 (0.93-1.57) |
| Secondary      | 1.33 (1.07-1.66) | 1.38 (1.06-1.79) |
| Higher         | 1.31 (0.74-2.29) | 1.01 (0.56-1.82) |

**Genital ulceration**

|                                      |                  |                  |
|--------------------------------------|------------------|------------------|
| No genital ulceration last 12 months | 1.00             | 1.00             |
| Genital ulceration last 12 months    | 1.65 (1.21-2.26) | 1.27 (0.93-1.76) |

---
