# Supplementary material for: No Evidence of Association between HIV-1 and Malaria in Populations with Low HIV-1 Prevalence
Source: PubMed Central journal article supplement (PMC3155564; doi:10.1371/journal.pone.0023458), 2011-08-12
Supplement: pone.0023458.s003.pdf [file pone.0023458.s003.pdf]

**Table S3.** Unadjusted and adjusted results from Cameroon: HIV serostatus according to selected socio-economic and biological characteristics.

| <b>Indicator</b>          | <b>OR (95% CI)</b> |                  |
|---------------------------|--------------------|------------------|
|                           | Unadjusted         | Adjusted         |
| <b>Malaria</b>            |                    |                  |
| <i>PfPR</i> ≤ 0.46        | 1.00               | 1.00             |
| <i>PfPR</i> > 0.46        | 1.64 (1.29-2.07)   | 1.56 (1.23-2.00) |
| <b>Gender</b>             |                    |                  |
| Female                    | 1.00               | 1.00             |
| Male                      | 0.55 (0.46-0.67)   | 0.58 (0.47-0.71) |
| <b>Age</b>                |                    |                  |
| 15-19                     | 1.00               | 1.00             |
| 20-24                     | 4.05 (2.67-6.13)   | 3.59 (2.33-5.52) |
| 25-29                     | 6.65 (4.42-9.98)   | 5.86 (3.76-9.14) |
| 30-34                     | 7.07 (4.66-10.71)  | 6.07 (3.82-9.63) |
| 35-39                     | 6.45 (4.18-9.95)   | 5.65 (3.48-9.15) |
| 40-49                     | 4.58 (2.99-7.02)   | 3.98 (2.46-6.43) |
| 50-59                     | 1.36 (0.60-3.10)   | 1.72 (0.73-4.09) |
| <b>Place of residence</b> |                    |                  |
| Urban                     | 1.00               | 1.00             |
| Rural                     | 0.63 (0.50-0.78)   | 0.76 (0.57-1.01) |
| <b>Marital status</b>     |                    |                  |
| Never married             | 1.00               | 1.00             |
| Currently married         | 2.41 (1.86-3.13)   | 1.17 (0.86-1.60) |
| Formerly married          | 5.39 (3.95-7.37)   | 2.66 (1.87-3.79) |
| <b>Religion</b>           |                    |                  |
| Muslim                    | 1.00               | 1.00             |
| Christian                 | 1.17 (0.86-1.59)   | 0.94 (0.67-1.30) |
| Traditional religion      | 0.45 (0.17-1.20)   | 0.51 (0.19-1.37) |
| Other                     | 1.14 (0.84-1.55)   | 0.92 (0.66-1.27) |

**Wealth index**

|         |                  |                  |
|---------|------------------|------------------|
| Poorest | 1.00             | 1.00             |
| Poorer  | 0.99 (0.64-1.51) | 0.88 (0.57-1.36) |
| Middle  | 1.94 (1.33-2.83) | 1.66 (1.12-2.47) |
| Richer  | 2.26 (1.55-3.29) | 1.90 (1.24-2.93) |
| Richest | 2.09 (1.43-3.06) | 1.70 (1.06-2.93) |

**Highest educational level**

|                |                  |                  |
|----------------|------------------|------------------|
| None           | 1.00             | 1.00             |
| Primary school | 1.44 (1.03-2.02) | 1.33 (0.91-1.94) |
| Secondary      | 1.45 (1.03-2.04) | 1.24 (0.82-1.86) |
| Higher         | 1.05 (0.57-1.96) | 0.7 (0.37-1.43)  |

**Genital ulceration**

|                                      |                  |                  |
|--------------------------------------|------------------|------------------|
| No genital ulceration last 12 months | 1.00             | 1.00             |
| Genital ulceration last 12 months    | 1.81 (1.14-2.88) | 1.39 (0.87-2.22) |

---
